# Supplementary material for: Growth of bulk BiOBr single crystals for the characterization of intrinsic semi-conductive properties and application in ultraviolet photodetectors
Source: Royal Society of Chemistry journal article supplement (doi:10.1039/d2tc01864k), 2022-01-01
Supplement: d2tc01864k1.pdf [file d2tc01864k1.pdf]

## Supporting Information

### **Growth of Bulk BiOBr Single Crystals for Characterization of Intrinsic Semi-Conductive Properties and Application of Ultraviolet Photodetector**

*Caiyun Zhang<sup>a</sup>, Lingtong Lin<sup>a</sup>, Jia Song<sup>a</sup>, Longfei Lei<sup>a</sup>, Liuyuan Han<sup>a</sup>, Yuanyuan Liu<sup>\*a</sup>, Jian Zhang<sup>\*a</sup>, Zhaoke Zheng<sup>a</sup>, Zeyan Wang<sup>a</sup>, Peng Wang<sup>a</sup>, Hefeng Cheng<sup>a</sup>, Ying Dai<sup>b</sup>, Baibiao Huang<sup>\*a</sup>*

<sup>a</sup> State Key Laboratory of Crystal Materials, Shandong University, Jinan 250100, P. R. China

<sup>b</sup> School of Physics, Shandong University, Jinan 250100, P. R. China

\*Corresponding author

E-mail: [yylu@sdu.edu.cn](mailto:yylu@sdu.edu.cn)

E-mail: [jian.zhang@sdu.edu.cn](mailto:jian.zhang@sdu.edu.cn)

E-mail: [bbhuang@sdu.edu.cn](mailto:bbhuang@sdu.edu.cn)

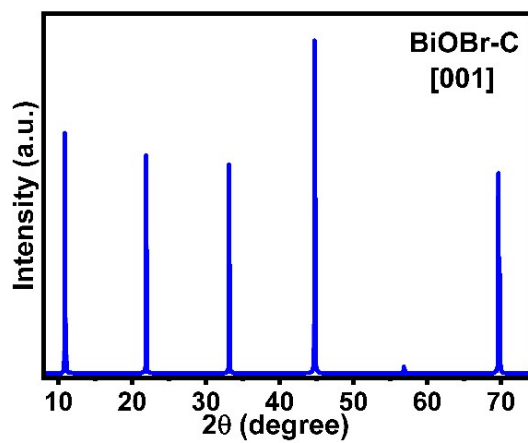

**Fig. S1.** XRD pattern of BiOBr-C showing [001] reflection direction.

| Element      | BiOBr-C  |          | BiOBr-P  |          |
|--------------|----------|----------|----------|----------|
|              | Weight % | Atomic % | Weight % | Atomic % |
| <b>Bi</b>    | 6.15     | 37.33    | 6.02     | 36.86    |
| <b>O</b>     | 25.37    | 30.84    | 25.22    | 30.91    |
| <b>Br</b>    | 68.48    | 31.83    | 68.76    | 32.23    |
| <b>Total</b> | 100      |          | 100      |          |

**Table S1.** EDS for BiOBr-C and BiOBr-P.

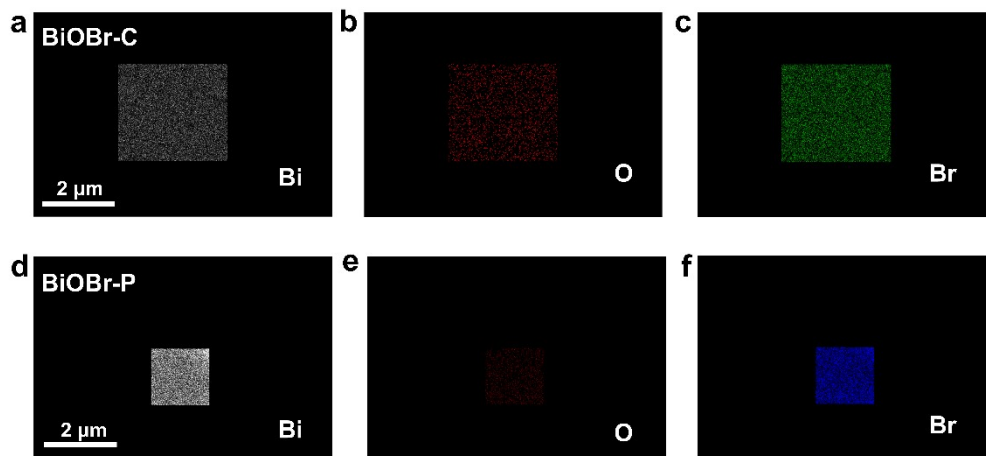

**Fig. S2.** The mapping images of Bi, O and Br elemental of BiOBr-C (a-c) and BiOBr-P (d-f) for the surface.

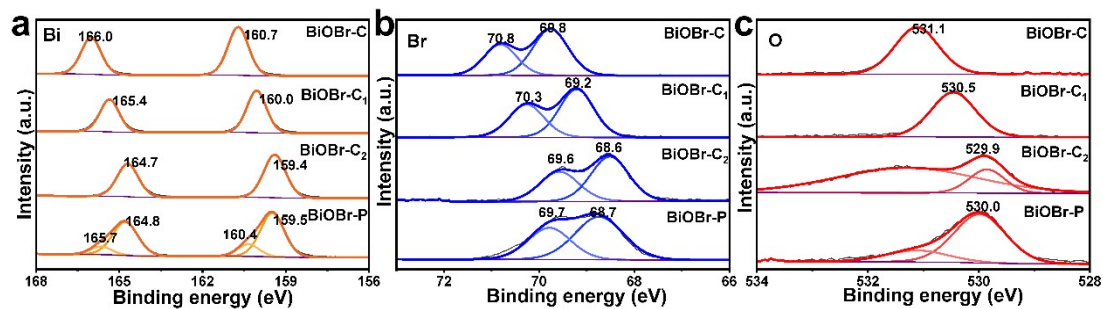

**Fig. S3.** XPS of (a) Bi 4f, (b) Br 3d and (c) O 1s of freshly exfoliated BiOBr-C (BiOBr-C), BiOBr-C exposed to air for one day after exfoliation (BiOBr-C<sub>1</sub>), the as-obtained BiOBr-C (BiOBr-C<sub>2</sub>), and BiOBr-P.

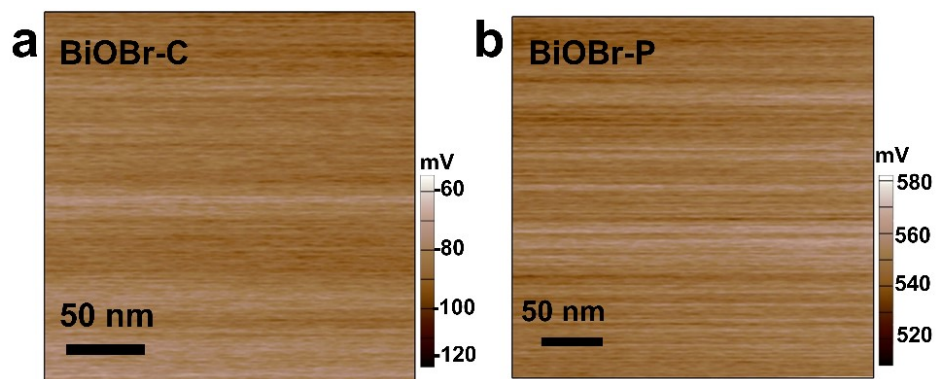

**Fig. S4.** The surface potential scan images of (a) BiOBr-C and (b) BiOBr-P.

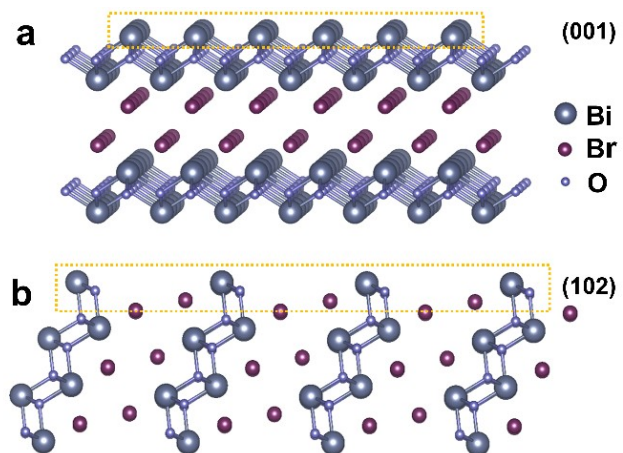

**Fig. S5.** The atomic structure models of (001) and (102) facets corresponding to (a) and (b) figures, respectively.

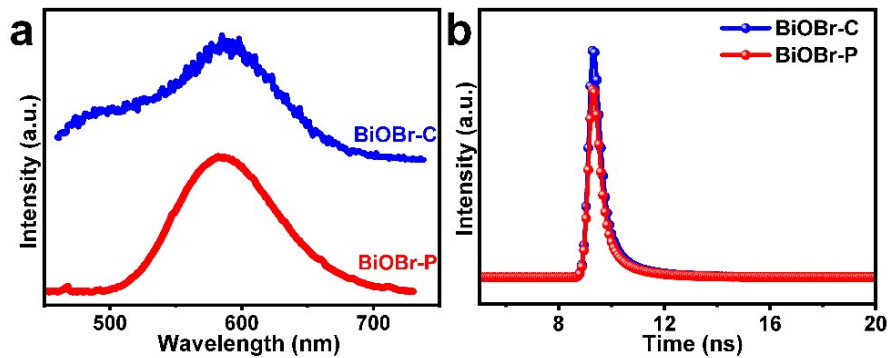

**Fig. S6.** (a) Low-temperature steady-state PL spectra under 8 K monitored at the emission peak of BiOBr-C and BiOBr-P; (b) room temperature time-resolved PL spectra of BiOBr-C and BiOBr-P, the excitation wavelength of 375 nm.

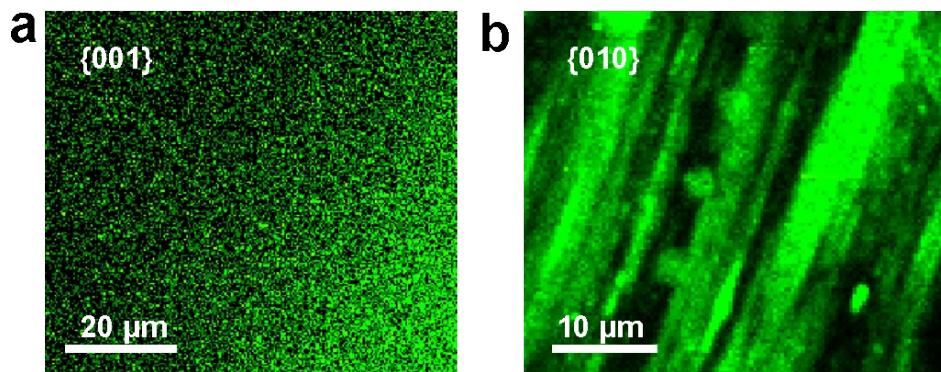

**Fig. S7.** Single-particle PL images for (a) the {001} and (b) {010} facets of BiOBr-C with 375 nm excitation wavelength.

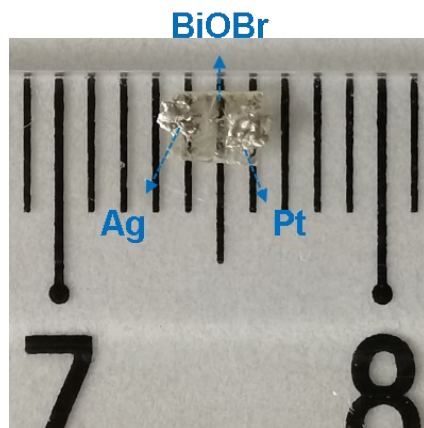

**Fig. S8.** The photograph of the real device.

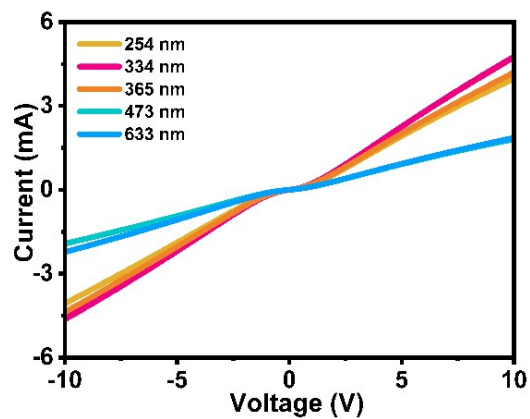

**Fig. S9.**  $I-V$  curves of the prepared BiOBr photodetector illuminated by light with different wavelength.

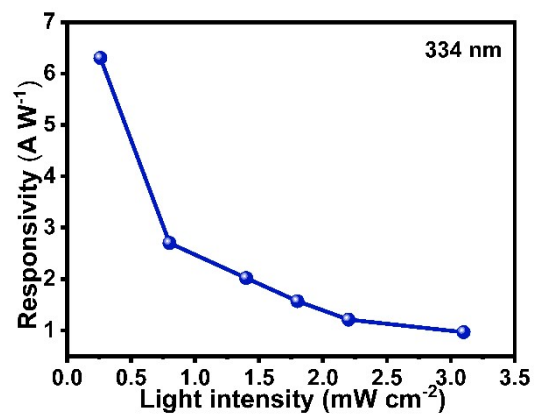

**Fig. S10.** Light intensity-dependent responsivity measured at wavelength of 334 nm.
